# Supplementary material for: Long noncoding RNAs as novel predictors of survival in human cancer: a systematic review and meta-analysis
Source: Springer Nature journal article supplement (doi:10.1186/s12943-016-0535-1), 2016-06-28
Supplement: MOESM3 [file 10293932]

**Figure S1.** The covariates included within the multivariable models fitted by each paper. This is a data microarray in which the studies run along the Y-axis and the covariates run along the X-axis. Rows and columns are ordered in descending order, based on the total number each covariate was included in the multivariable models fitted by each study. Where patterns were similar between studies or covariates, those studies or covariates were placed next to each other.

It is evident that very few studies included the same covariates within their models and that less than half of the studies included both Stage and Grade within those models. Interestingly, the majority of studies included at least one covariate within their model that had not been included in any other study. Green = Included in the multivariable model; Red = Not included in the multivariable model.
